# Supplementary material for: Growth of Romaine Lettuce in Eggshell Powder Mixed Alginate Hydrogel in an Aeroponic System for Water Conservation and Vitamin C Biofortification
Source: MDPI journal article supplement (doi:10.3390/gels10050322), 2024-05-09
Supplement: s1 [file s1]

## Supporting Information

### Growth of Romaine Lettuce in Eggshell Powder Mixed Alginate Hydrogel in an Aeroponic System for Water Conservation and Vitamin C Biofortification

Fariha Afnan,<sup>1</sup> Md Nayeem Hasan Kashem,<sup>1</sup> Rutwik Joshi,<sup>1</sup> Catherine Simpson,<sup>2\*</sup> Wei Li <sup>1\*</sup>

1. Department of Chemical Engineering, Texas Tech University, Lubbock, TX, United States

2. Department of Plant and Soil Science, Texas Tech University, Lubbock, TX, United States

\* Corresponding authors: [Catherine.simpson@ttu.edu](mailto:Catherine.simpson@ttu.edu) and [wei.li@ttu.edu](mailto:wei.li@ttu.edu)

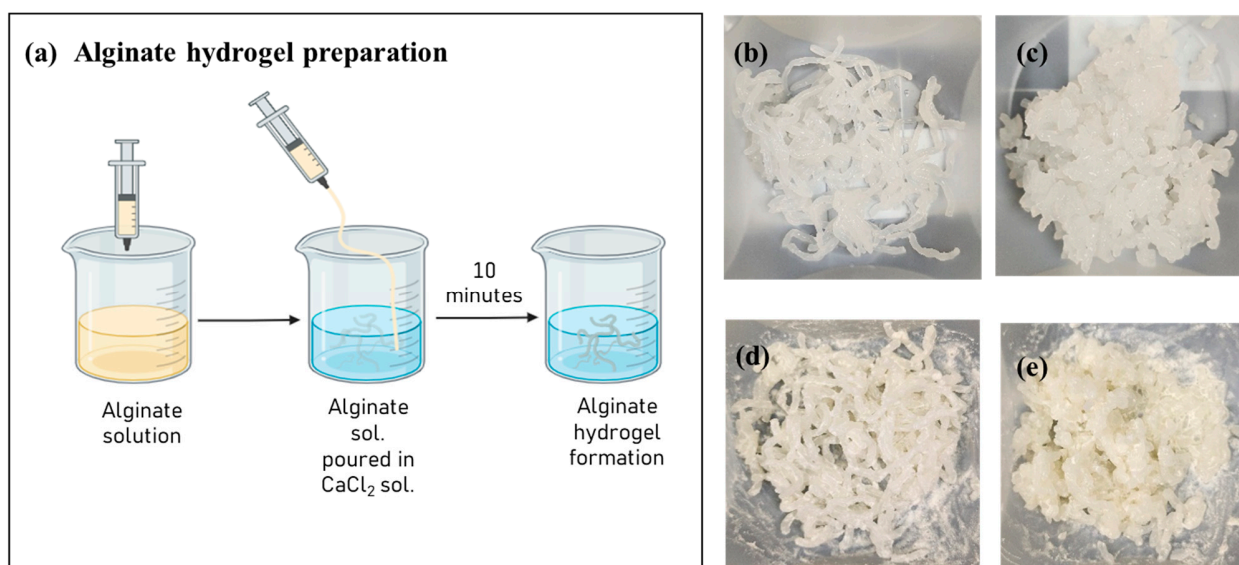

**Figure S1:** (a) Preparation of alginate hydrogel, (b) Freshly prepared coarse hydrogel, (c) Freshly prepared fine hydrogel, (d) Freshly prepared coarse hydrogel with 15 wt.% eggshell powder, (e) Freshly prepared fine hydrogel mixed with 15 wt. % eggshell powder.

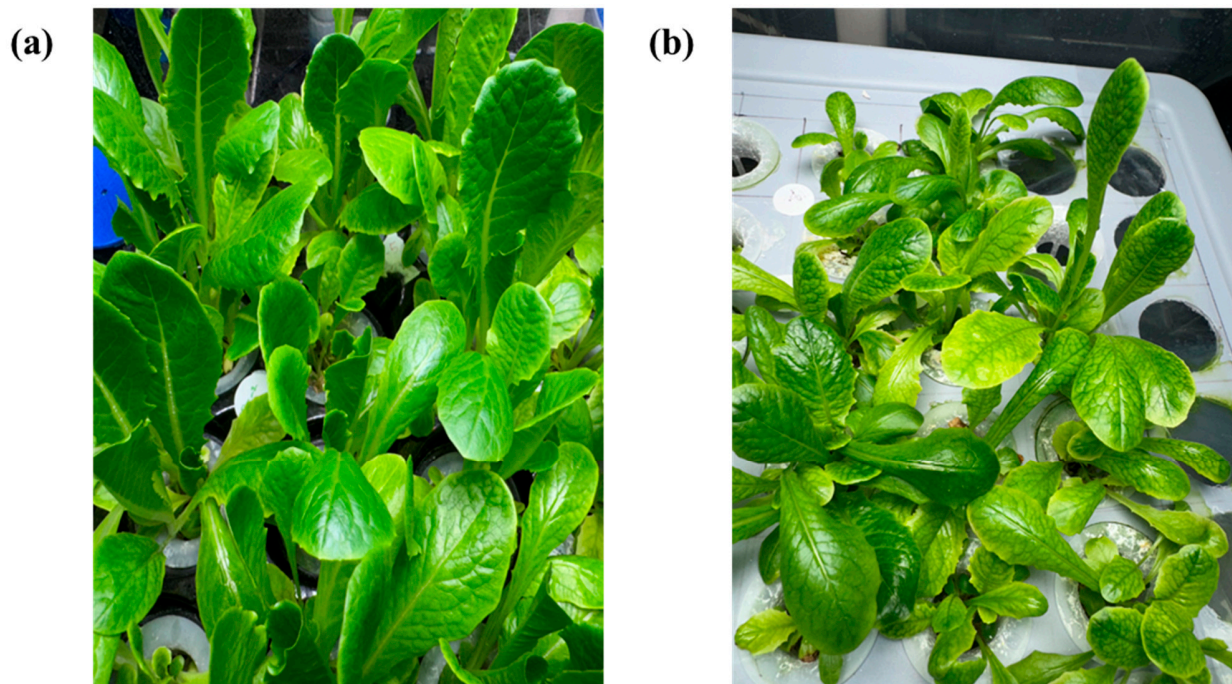

**Figure S2:** (a) Leaves without ascorbic acid, (b) Leaves with 0.5% ascorbic acid.

**Table S1:** Student's t-test results for hydrogels with different ESP concentrations for leaf area increase

| Parameters          | t      | $t_{critical}$ | P     | Null Hypothesis |
|---------------------|--------|----------------|-------|-----------------|
| ESP Conc.<br>(wt.%) |        |                |       |                 |
| 5, 7.5 (C/C)        | 1.538  | 1.19           | 0.15  | not void        |
| 5, 10 (C/C)         | 0.644  | 0              | 0.5   | not void        |
| 5, 15 (C/C)         | 2.767  | 2.132          | 0.05  | void            |
| 15, 5 (C/F)         | 3.107  | 2.776          | 0.025 | void            |
| 15, 7.5 (C/F)       | 0.6302 | 0              | 0.5   | not void        |
| 15, 10 (C/F)        | 1.25   | 1.19           | 0.15  | not void        |
| 15, 15 (C/F)        | 5.628  | 4.604          | 0.005 | void            |

Note: C/C = Comparison between Coarse and Coarse hydrogel

C/F= Comparison between Coarse and Fine hydrogel

**Table S2:** Student's t-test results for hydrogels with different ESP concentrations for shoot length

| Parameters          | t     | t <sub>critical</sub> | P     | Null Hypothesis |
|---------------------|-------|-----------------------|-------|-----------------|
| ESP Conc.<br>(wt.%) |       |                       |       |                 |
| 15, 5 (F/C)         | 2.969 | 2.776                 | 0.025 | void            |
| 15, 7.5 (F/C)       | 2.629 | 2.132                 | 0.05  | void            |
| 15, 10 (F/C)        | 3.766 | 3.747                 | 0.01  | void            |
| 15, 15 (F/C)        | 5.757 | 4.604                 | 0.005 | void            |

F/C= Comparison between Fine and Coarse hydrogel

**Table S3:** Student's t-test results for hydrogels with different ESP concentrations for RSR

| Parameters          | t     | t <sub>critical</sub> | P     | Null Hypothesis |
|---------------------|-------|-----------------------|-------|-----------------|
| ESP Conc.<br>(wt.%) |       |                       |       |                 |
| 5, 7.5 (C/C)        | 3.647 | 2.776                 | 0.01  | void            |
| 5, 10 (C/C)         | 7.063 | 4.604                 | 0.005 | void            |
| 5, 15 (C/C)         | 0.803 | 0.741                 | 0.25  | not void        |
| 15, 5 (C/F)         | 2.065 | 1.533                 | 0.1   | not void        |
| 15, 7.5 (C/F)       | 5.096 | 4.604                 | 0.005 | void            |
| 15, 10 (C/F)        | 4.58  | 4.604                 | 0.005 | void            |
| 15, 15 (C/F)        | 5.969 | 4.604                 | 0.005 | void            |
